# Supplementary material
Source: HighWire-hosted journal article supplement (https://bmjopen.bmj.com/content/11/1/e041607)
Supplement: inline-supplementary-material-1 [file inline-supplementary-material-1.xlsx]

## Sheet: Data extraction form
Study			Population								Intervention			Comparator		Outcomes							Comments
First author (or study name), Year (REF)	Country	Sample size	General population (y/n)	Cancer population (y/n)	Cancer site + stage	Age (mean or median)	Sex (female %)	Race/ ethnicity/ skin color (white %)	BMI [kg/m²] (n, mean or median)	25(OH)D (n, mean or median)	Vitamin D3 dosing regimen	Duration of vitamin D3 supplementation	Compliance in intervention group (%)	Placebo (y/other)	Compliance in comparator group (%)	Maximum follow-up time	Mean or median follow-up time	No of cancer deaths	Cancer mortality in general population HR (95% CI)	Cancer-specific survival of cancer patients HR (95% CI)	Overall survival of cancer patients HR (95%CI)	Covariates adjusted for

## Sheet: Risk of bias
	First author (or study name), Year (REF)	R	D	Mi	Me	S	O
Risk of bias legend
R	Bias arising from the randomiation process
D	Bias due to deviations from intended interventions
Mi	Bias due to missing outcome data
Me	Bias in measurement of the outcome
S	Bias in selection of the reported result
O	Overall risk of bias

## Sheet: IPD
The following variables will be obtained for all trial participants in order to conduct the IPD meta-analysis:
No.	Variables
1	Age
2	Sex
3	BMI
4	Race/ethnicity/skin color
5	Baseline 25(OH)D levels
6	Compliance
7	Randomisation group allocation
8	Baseline date
9	Death during follow-up (y/n)
10	Date of death
11	Censoring date for survivors
12	Cancer death during follow-up (y/n)
13	Date of cancer death
14	Censoring date for non-cancer deaths
15	Cancer* diagnosis during follow-up (y/n)
16	Cancer* site for each cancer during follow-up
17	Cancer* stage for each cancer during follow-up
18	Date of cancer* diagnosis for each cancer during follow-up
19	Cancer* diagnosis in first 5 years before baseline (y/n)
20	Cancer* site for each cancer in first 5 years before baseline
21	Cancer* stage for each cancer in first 5 years before baseline
22	Date of cancer* diagnosis for each cancer in first 5 years before baseline
*	Excluding non-melanoma skin cancers and benign tumors
